# Supplementary material
Source: HighWire-hosted journal article supplement (https://bmjopen.bmj.com/content/13/8/e072984)
Supplement: inline-supplementary-material-1 [file inline-supplementary-material-1.pdf]

**Supplementary Table 1:**

| <i>Name</i>                  | <i>Registry</i>    | <i>Description</i>                                                                                                                                             | <i>Full name of registry</i>                                                     |
|------------------------------|--------------------|----------------------------------------------------------------------------------------------------------------------------------------------------------------|----------------------------------------------------------------------------------|
| Sex                          | BEF registry       | Gender of the included population extracted from BEF registry (population registry)                                                                            | BEF = Befolkning                                                                 |
| Age at cataract onset        | NPR + BEF registry | The date of cataract diagnosis was extracted from NPR (The National Patient Registry) and calculated based on birth date in BEF registry (population registry) | NPR = The National Patient Registry+<br>BEF = Befolkning                         |
| Geographical birth origin    | BEF registry       | Geographical birth origin is the place where the child was born extracted from BEF registry (population registry)                                              | BEF = Befolkning                                                                 |
| Children's mental disorders  | PSYK_DIAG_NPR      | Children's mental disorders diagnosed at public hospitals extracted from NPR (The National Patient Registry)                                                   | Psyk_diag_NPR= The National Patient Registry with focus on psychiatric diagnoses |
| Children's systemic diseases | LPR_DIAG           | Children's systemic disease diagnosed at public hospitals extracted from NPR (The National Patient Registry)                                                   | NPR = The National Patient Registry                                              |
| Parental income              | IND registry       | Parental income extracted from IND registry (income registry)                                                                                                  | IND = Indkomst                                                                   |
| Parental work status         | AKM registry       | Information about parental work status extracted from AKM registry (work classification module)                                                                | AKM = Arbejdsklassifikationsmodulet                                              |
| Parental mental disorders    | PSYK_DIAG_NPR      | Parental mental disorders diagnosed at public hospitals extracted from NPR (The National Patient Registry)                                                     | Psyk_diag_NPR= The National Patient Registry with focus on psychiatric diagnoses |
